# Supplementary material for: A drug library screen identifies Carbenoxolone as novel FOXO inhibitor that overcomes FOXO3-mediated chemoprotection in high-stage neuroblastoma
Source: PubMed Central journal article supplement (PMC6989399; doi:10.1038/s41388-019-1044-7), 2019-10-07

# Supplemental Figure S2

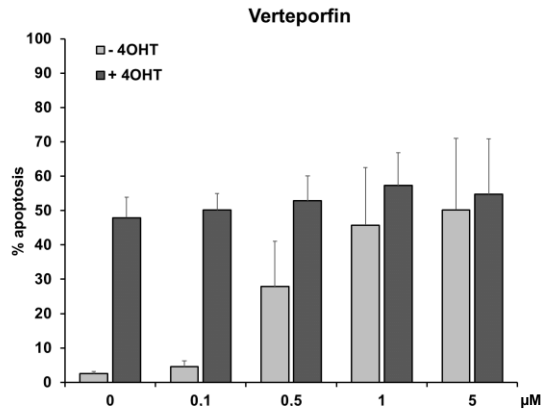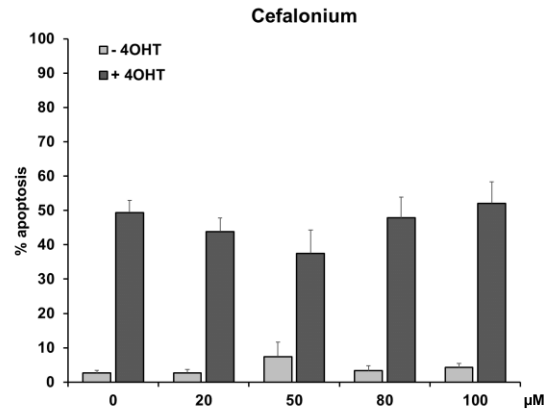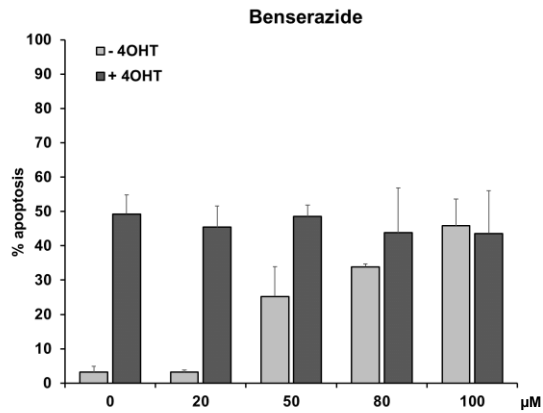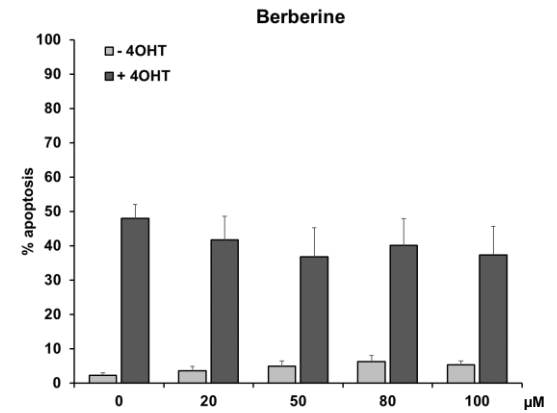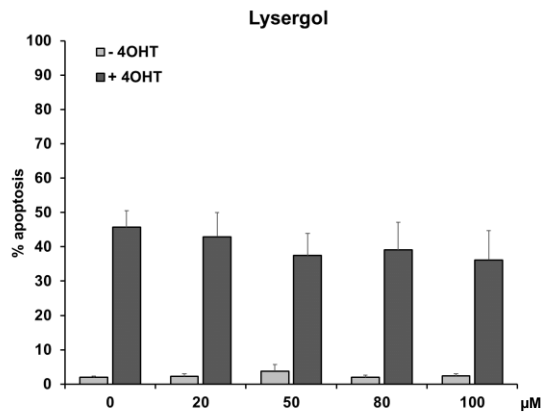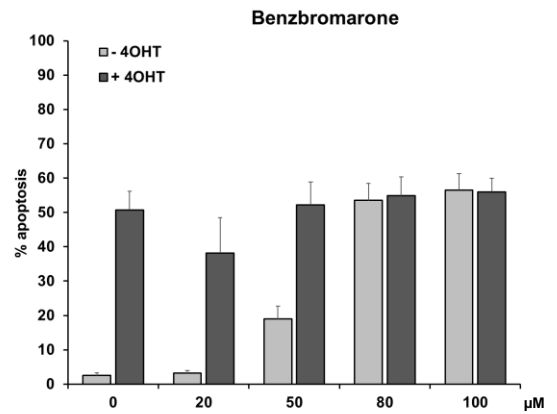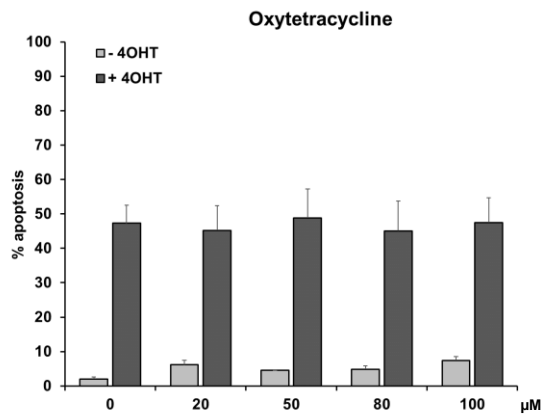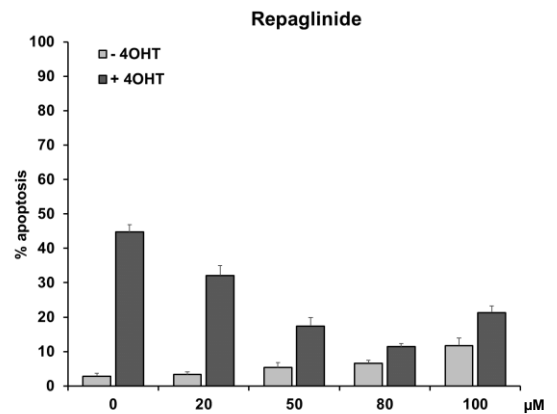

Supplement: 41388_2019_1044_MOESM3_ESM.pdf [file 41388_2019_1044_MOESM3_ESM.pdf]
